# Supplementary material for: Optimized Poly(3‐hydroxybutyrate‐co‐3‐hydroxyvalerate) (PHBV) Production by Moderately Haloalkaliphilic Bacterium Halomonas alkalicola Ext
Source: Hindawi journal article supplement (doi:10.1155/2024/6667843), 2024-01-01
Supplement: f1 [file 6667843.f1.docx]

**Optimized poly(3-hydroxybutyrate-co-3-hydroxyvalerate) (PHBV)** **production by moderately haloalkaliphilic bacterium *Halomonas alkalicola* Ext**

Martin N. Muigano1*, Sylvester E. Anami1, Justus M. Onguso1, and Godfrey M. Omare2

1 Institute of Biotechnology Research, Jomo Kenyatta University of Agriculture and Technology, P.O. Box 62000 -00200, Nairobi, Kenya

2 Department of Physical and Biological Sciences, Bomet University College, Bomet, P. O. Box 701-20400, Kenya

**Supplementary Materials**

Table S1: Analysis of variance (ANOVA) for the quadratic model of the interactive effects galactose concentration (A) and NaCl concentration (B) on CDW (g/L)

| Source of variation | Sum of Squares | DF | Mean Square | F-value | p-value |  |
| --- | --- | --- | --- | --- | --- | --- |
| Model | 7.59 | 4 | 1.90 | 115.11 | < 0.0001 | Significant |
| A-Galactose concentration | 1.62 | 1 | 1.62 | 98.48 | < 0.0001 |  |
| B-NaCl concentration | 1.51 | 1 | 1.51 | 91.51 | < 0.0001 |  |
| A² | 0.5537 | 1 | 0.5537 | 33.58 | 0.0004 |  |
| B² | 4.23 | 1 | 4.23 | 256.47 | < 0.0001 |  |
| Residual | 0.1319 | 8 | 0.0165 |  |  |  |
| Lack of Fit | 0.1012 | 4 | 0.0253 | 3.30 | 0.1372 | not significant |
| Pure Error | 0.0307 | 4 | 0.0077 |  |  |  |
| Cor Total | 7.72 | 12 |  |  |  |  |
| *R²* = 0.9829, Adjusted *R²* = 0.9744, Predicted *R²* = 0.9307, coefficient of variation (C.V.%) = 5.21%, Adequate Precision = 28.2080 | | | | | | |

Table S2: Analysis of variance (ANOVA) for the quadratic model of the interactive effects galactose concentration (A) and NaCl concentration (B) on PHA content as a % of CDW

| Source of variation | Sum of Squares | DF | Mean Square | F-value | p-value |  |
| --- | --- | --- | --- | --- | --- | --- |
| Model | 2837.75 | 5 | 567.55 | 315.85 | < 0.0001 | Significant |
| A-Galactose concentration | 269.51 | 1 | 269.51 | 149.99 | < 0.0001 |  |
| B-NaCl concentration | 727.57 | 1 | 727.57 | 404.91 | < 0.0001 |  |
| AB | 48.23 | 1 | 48.23 | 26.84 | 0.0013 |  |
| A² | 386.18 | 1 | 386.18 | 214.92 | < 0.0001 |  |
| B² | 1579.49 | 1 | 1579.49 | 879.02 | < 0.0001 |  |
| Residual | 12.58 | 7 | 1.80 |  |  |  |
| Lack of Fit | 3.35 | 3 | 1.12 | 0.4843 | 0.7112 | not significant |
| Pure Error | 9.23 | 4 | 2.31 |  |  |  |
| Cor Total | 2850.33 | 12 |  |  |  |  |
| *R²* = 0.9956, Adjusted *R²* = 0.9924, Predicted *R²* = 0.9866, coefficient of variation (C.V.%) = 4.23, Adequate Precision = 47.9022 | | | | | | |


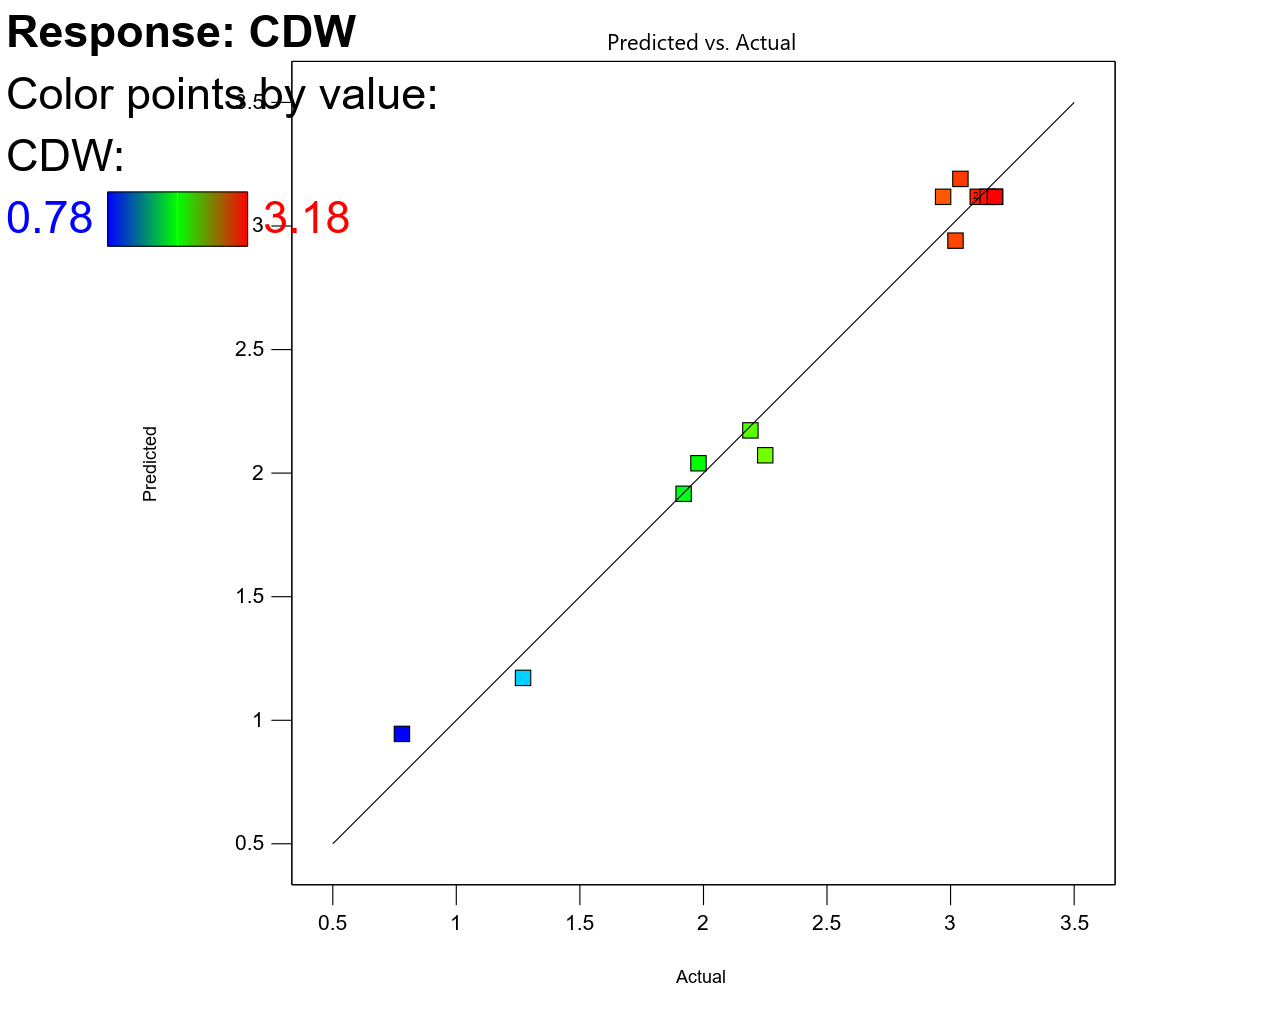


Figure S1: Correlation between predicted and actual results for CDW (g/L)


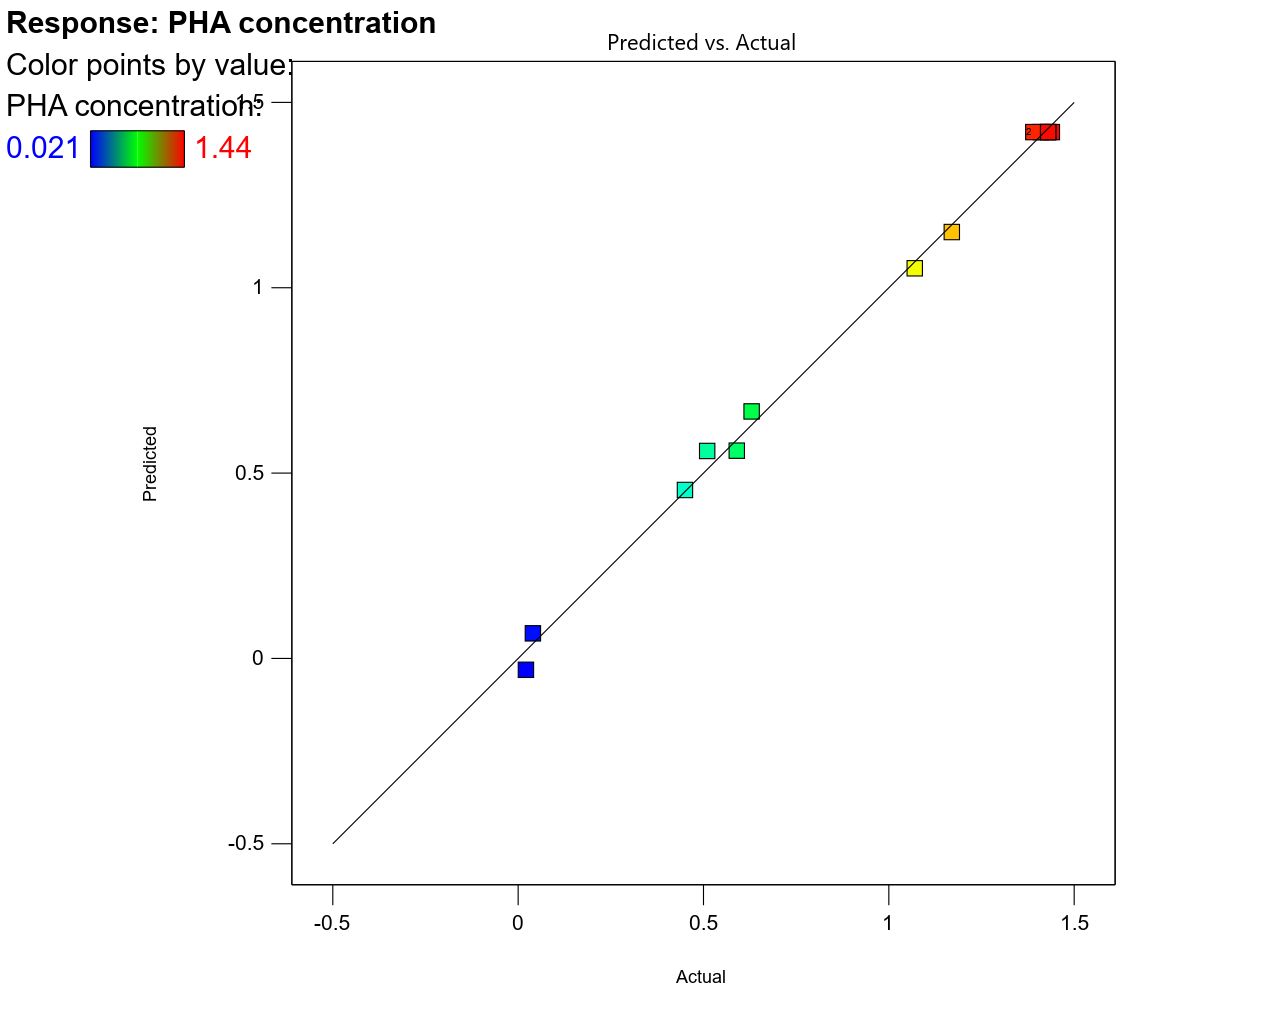


Figure S2: Correlation between predicted and actual results for PHA concentration (g/L)


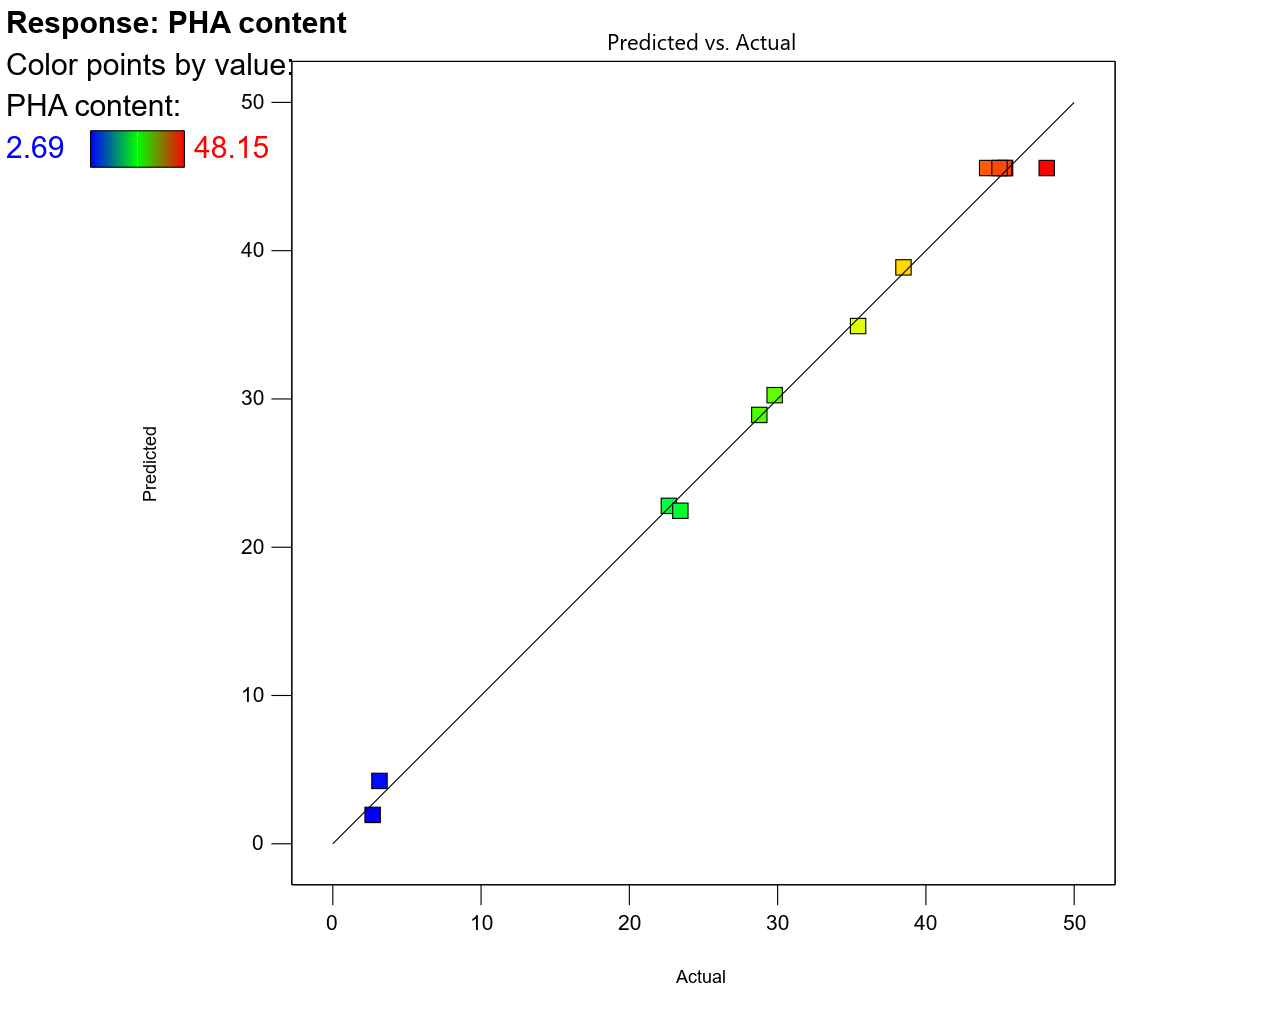


Figure S3: Correlation between predicted and actual results for PHA content (% of CDW)


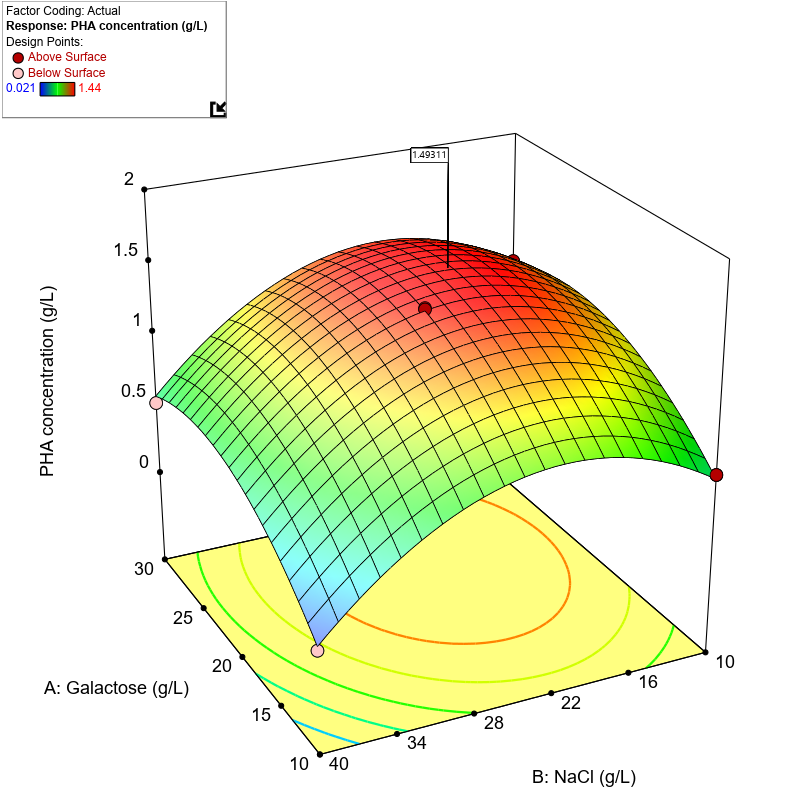


Figure S4: Three-dimensional interactions between Galactose concentration (A), NaCl concentration (B) and PHA production (g/L) for the highest possible yield.
